# Supplementary material
Source: PubMed Central journal article supplement (PMC3921020)
Supplement: NIHMS549050-supplement-supplement_1.pdf [file NIHMS549050-supplement-supplement_1.pdf]

**Supplementary Figure 1.** Representative image showing selective detection of CD-31<sup>+</sup> pixels using MetaMorph 7.7 imaging software. The original image is shown in Figure 6B.

**Supplementary Figure 2.** Original whole gel images of data depicted in Figure 1B. Lanes shown in Figure 1B are depicted by an asterisk. Gel 1: elution profile of Granzyme B/VEGF<sub>121</sub> from HEK-293T conditioned media. Purity greater than 95% was obtained. Gel 2: Asterisked SDS-PAGE lanes show GrB/VEGF<sub>121</sub> under reducing and non-reducing conditions, and show that the majority of the purified protein is a natural homodimer.

**Supplementary Figure 3.** Total VEGFR-2 expression assessed by Western blot analysis (top) and flow cytometry (bottom). Corresponding western blot lanes for VEGFR-2 and Actin are numerically indicated. VEGFR-2 expression in bEND.3 cells was tested using both methods, and has been previously reported as  $2 \times 10^5$  receptors per cell<sup>1</sup>.

**Supplementary Figure 4.** Internalization of GrB/VEGF<sub>121</sub> into PAE/VEGFR-1 is much lower than into PAE/VEGFR-2 cells. Cells were treated with 20 nM GrB/VEGF<sub>121</sub> for 24 h, followed by removal of cell surface-bound protein as described in Methods. Cells were treated with mouse anti-GrB monoclonal antibody followed by a goat anti-mouse AF488 antibody.

1. Veenendaal LM, Jin H, Ran S, Cheung L, Navone N, Marks JW, Waltenberger J, Thorpe P, Rosenblum MG. In vitro and in vivo studies of a VEGF121/rGelolin chimeric fusion toxin targeting the neovasculature of solid tumors. Proc Natl Acad Sci U S A 2002;99:7866-71.

## Quantitation of CD-31+ areas in PC-3 Tumors

### Efficacy Treatment

Saline

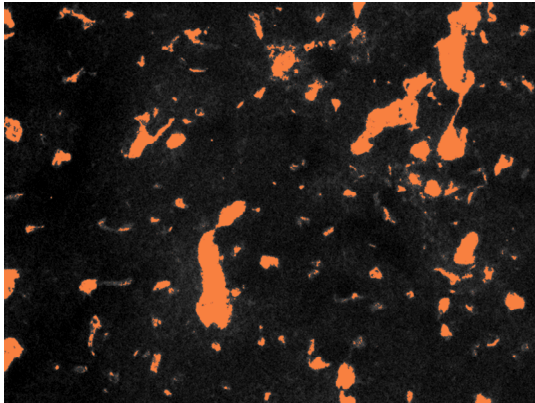

GrB/VEGF<sub>121</sub>

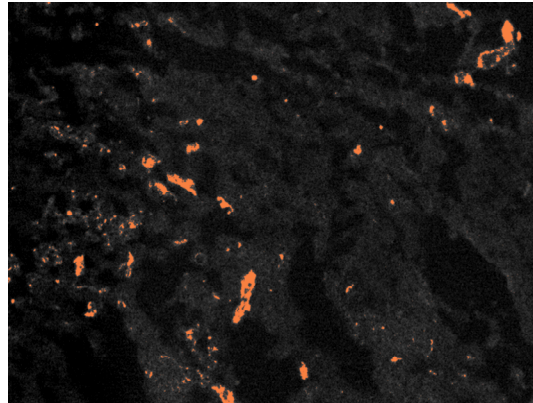

Supplementary Figure 1

## Expression and Purification of GrB/VEGF<sub>121</sub> from HEK-293T Cells

\* Lanes shown in Figure 1

### Gel 1 Purification of Pro-GrB/VEGF<sub>121</sub> on Co-IMAC

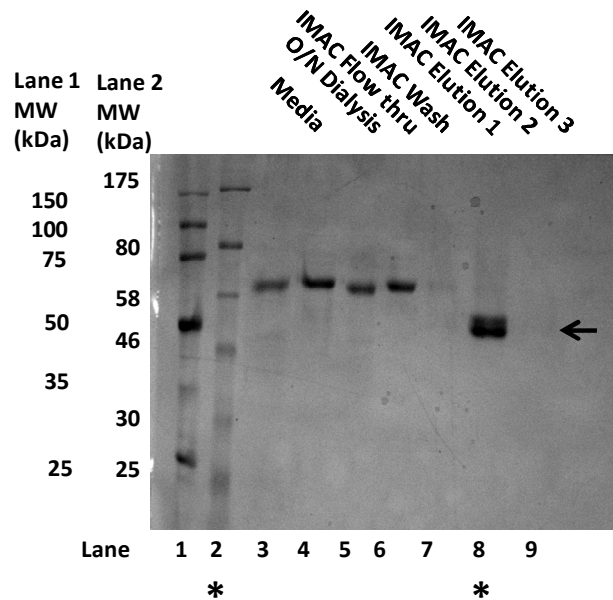

### Gel 2 GrB/VEGF<sub>121</sub> following removal of the His<sub>6</sub> Tag by Enterokinase

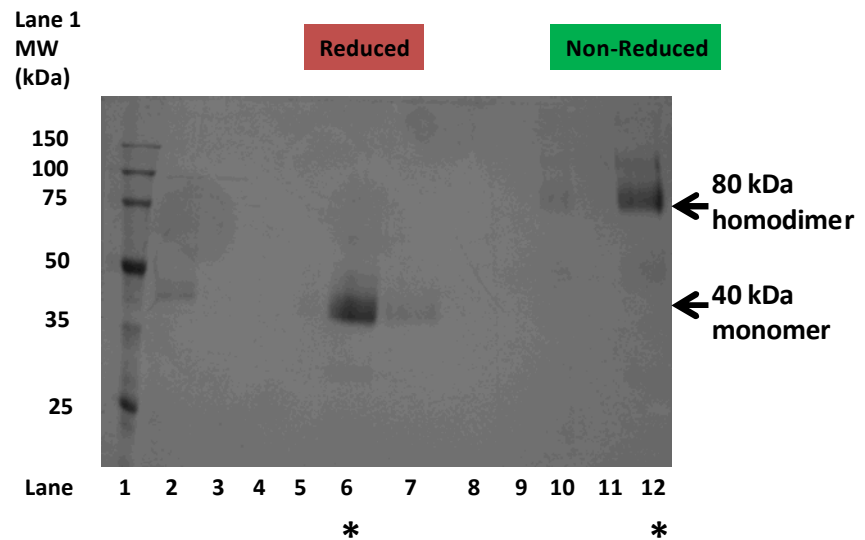

Supplementary Figure 2

VEGFR-2 Lanes 1 2 3 4 5 6

PAE/KDR PAE/FLT-1  
bEND.3 KS 1767  
RAW264.7 TC71

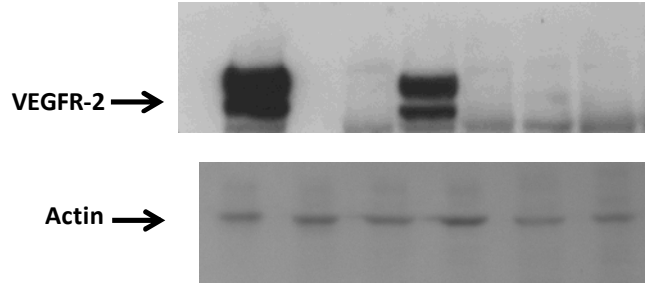

Actin Lanes 1 2 3 4 5 6

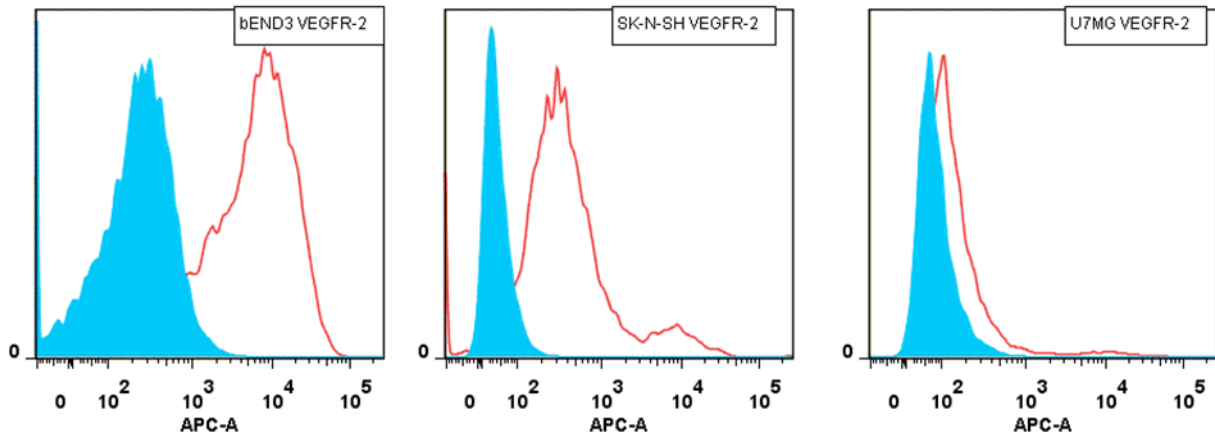

Supplementary Figure 3

PAE/VEGFR-1, GrB/VEGF<sub>121</sub>, 24 h

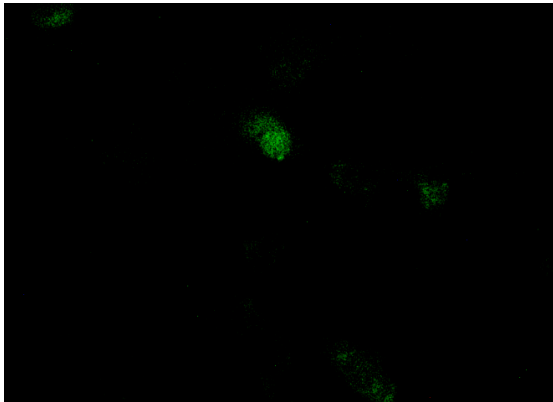

PAE/VEGFR-2, GrB/VEGF<sub>121</sub>, 24 h

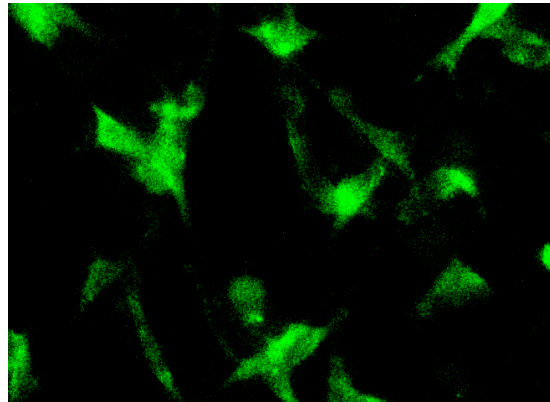

Supplementary Figure 4
